# Supplementary material for: Recent advances in mechanical ventilation in patients with acute respiratory distress syndrome
Source: PubMed Central journal article supplement — Eur Respir Rev. 2015 Mar;24(135):132–40. doi: 10.1183/09059180.00012414 (PMC9487769; doi:10.1183/09059180.00012414), 2015-03
Supplement: ERR-0124-2014_Brochard.pdf [file ERR-0124-2014_Brochard.pdf]

To view the full contents of this document, you need a later version of the PDF viewer. You can upgrade to the latest version of Adobe Reader from [www.adobe.com/products/acrobat/readstep2.html](http://www.adobe.com/products/acrobat/readstep2.html)

For further support, go to [www.adobe.com/support/products/acrreader.html](http://www.adobe.com/support/products/acrreader.html)
